# Supplementary material for: Facile synthesis of nanocrystalline-assembled nest-like NiO hollow microspheres with superior lithium storage performance
Source: Royal Society of Chemistry journal article supplement (doi:10.1039/c7ra05373h), 2017-01-01
Supplement: c7ra05373h1.pdf [file c7ra05373h1.pdf]

## Supplementary material

### Facile synthesis of nanocrystalline-assembled nest-like NiO hollow microspheres with superior lithium storage performances

Yanwei Li <sup>a\*</sup>, Yuanyuan Zheng <sup>a</sup>, Jinhuan Yao <sup>a\*</sup>, Jianrong Xiao <sup>b</sup>, Jianwen Yang <sup>a</sup>, Shunhua Xiao <sup>a</sup>

<sup>a</sup> Guangxi Key Laboratory of Electrochemical and Magneto-chemical Functional Materials, College of Chemistry and Bioengineering, Guilin University of Technology, Guilin 541004, China

<sup>b</sup> College of Science, Guilin University of Technology, Guilin, 541008, China

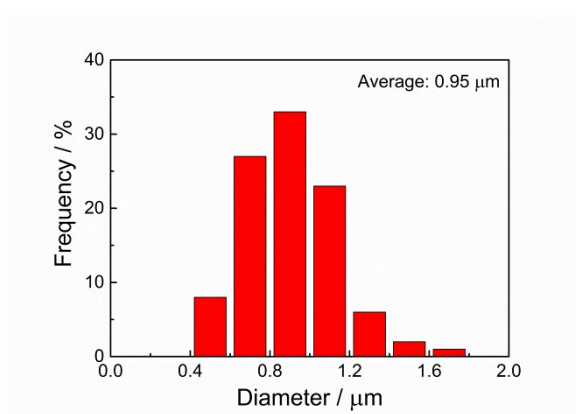

Fig. s1 the statistics of particle distribution of the NiO hollow microspheres.

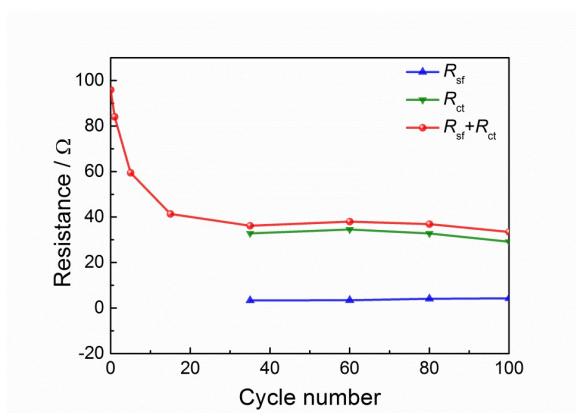

Fig. s2 the plots of fitting result.
